# Supplementary material for: Effect of fat replacement with HPMC and lecithin stabilised nanoemulsion on the physical characteristics and sensory attributes of short dough biscuits
Source: Research Square preprint supplement (doi:10.21203/rs.3.rs-2515369/v1), 2023-02-02
Supplement: Supplementary file 1 [file 079079ae3b4bb1c106e3a5a5.docx]

**Supplementary Table 1.** Attributes, scale extremes and definitions used in the descriptive sensory analysis of the biscuits by a trained panel for the QDA.

| Attribute | Scale extremes | Definitions |
| --- | --- | --- |
| **Appearance** |  |  |
| Shiny | low - high | Degree of shininess, which is the tendency of a surface to reflect light |
| Surface smoothness | none - extremely | Overall impression of the texture without roughness of the top surface of the biscuit. |
| Dark specks | none - lots | The number of dark specks within the biscuit. |
| Crumb density | low - high | The amount of air incorporated into the interior of the biscuit, observed visually upon breaking the biscuit in two. |
| **Aroma** |  |  |
| Buttery | none - extremely | Intensity of a distinct butter aroma |
| Sugary | none - extremely | Intensity of sweet aroma, similar to table sugar. |
| Floury | none - extremely | Intensity of a distinct white wheat flour aroma |
| Baked | none - extremely | Intensity of bake aroma, similar to baked bakery |
| **Taste and Flavour** |  |  |
| Sweet | none - extremely | Intensity of sweet taste (Sucrose) |
| Buttery | none - extremely | Intensity of a distinct butter flavour |
| Flour | none - extremely | Intensity of a distinct white wheat flour flavour |
| Fatty/ Oily | none - extremely | Intensity of a distinct vegetable oil flavour |
| Salty | none - extremely | Intensity of salty taste (sodium chloride) |
| Savoury | none - extremely | Intensity of umami taste (monosodium glutamate) |
| **Mouthfeel** |  |  |
| Bite | soft – firm | Degree of force perceived at first bite |
| Crumbly | not – extremely | Degree of which the biscuit breaks into crumbs upon first bite |
| Density | low – high | Degree of how compact the inside of biscuit was upon chewing |
| Rate of clearance | slow- fast | Speed at which sample was able to be cleared from the mouth |
| Pasty | none - extremely | Degree to which the crumbs of biscuit begin to absorb saliva and form a paste |
| Dryness | none - extremely | Lack of lubrication in the mouth |
| Gritty | none - extremely | Degree of grainy or sandy texture |
| **Aftereffect** |  |  |
| Drying | none - extremely | Degree to which 30 s after the biscuit was swallowed, your mouth still feels dry. |
| Tooth packing | none - extremely | Degree to which biscuit sticks to the surface of teeth |
| Salivating | none - extremely | Amount of saliva produced in the mouth |
| Floury/ powdery | none - extremely | Intensity of a powdery aftertaste |
| Sweet | none - extremely | Intensity of sweet aftertaste |
| Greasy | none - extremely | Degree to which the biscuit leaves an oily residue |
| Numbing/ cooling | none - extremely | Intensity of a numb sensation associated with a coolness in the mouth |
